# Supplementary material for: Associations between Abnormal Eating Styles and Irritable Bowel Syndrome: A Cross-Sectional Study among Medical School Students
Source: MDPI journal article supplement (doi:10.3390/nu14142828), 2022-07-09
Supplement: s1 [file s1]

**Table S1.** Characteristics of participants according to tertiles of external eating.

| Characteristic                        | External Eating |              |               |
|---------------------------------------|-----------------|--------------|---------------|
|                                       | Tertile 1       | Tertile 2    | Tertile 3     |
| N                                     | 893             | 857          | 989           |
| Age (years)                           | 21.59 ± 2.68    | 21.48 ± 2.65 | 21.951 ± 2.86 |
| BMI (kg/m <sup>2</sup> )              | 22.97 ± 6.63    | 22.84 ± 6.63 | 23.03 ± 7.06  |
| <b>Gender</b>                         |                 |              |               |
| Male                                  | 597 (66.85)     | 505 (58.93)  | 616 (62.29)   |
| Female                                | 296 (33.15)     | 352 (41.07)  | 373 (37.71)   |
| <b>Monthly living expenses (yuan)</b> |                 |              |               |
| ≤1200                                 | 424 (47.48)     | 406 (47.37)  | 551 (55.71)   |
| >1200                                 | 469 (52.52)     | 451 (52.63)  | 438 (44.29)   |
| <b>Major</b>                          |                 |              |               |
| Clinical Medicine                     | 328 (36.73)     | 306 (35.71)  | 274 (27.70)   |
| Others                                | 565 (63.27)     | 551 (64.29)  | 715 (72.30)   |
| <b>Obesity</b>                        |                 |              |               |
| No                                    | 739 (87.46)     | 705 (88.46)  | 669 (86.77)   |
| Yes                                   | 106 (12.54)     | 92 (11.54)   | 102 (13.23)   |
| <b>Smoking</b>                        |                 |              |               |
| No                                    | 719 (80.52)     | 628 (73.28)  | 458 (46.31)   |
| Yes                                   | 174 (19.48)     | 229 (26.72)  | 531 (53.69)   |
| <b>Drinking</b>                       |                 |              |               |
| No                                    | 640 (71.67)     | 493 (57.53)  | 386 (39.03)   |
| Yes                                   | 253 (28.33)     | 364 (42.47)  | 603 (60.97)   |
| <b>Physical activity</b>              |                 |              |               |
| Inactive                              | 543 (65.11)     | 477 (60.15)  | 715 (78.31)   |
| Partially active                      | 147 (17.63)     | 187 (23.58)  | 99 (10.84)    |
| Active                                | 144 (17.27)     | 129 (16.27)  | 99 (10.84)    |

Values were means (standard deviation) or n (percentages), and values of polytomous variables may not sum to 100% because of rounding.

**Table S2.** Characteristics of participants according to tertiles of restraint eating.

| Characteristic                        | Restraint Eating |              |              |
|---------------------------------------|------------------|--------------|--------------|
|                                       | Tertile 1        | Tertile 2    | Tertile 3    |
| N                                     | 883              | 938          | 918          |
| Age (years)                           | 21.42 ± 2.64     | 21.66 ± 2.68 | 21.98 ± 2.88 |
| BMI (kg/m <sup>2</sup> )              | 22.60 ± 6.61     | 23.20 ± 6.74 | 23.06 ± 6.99 |
| <b>Gender</b>                         |                  |              |              |
| Male                                  | 589 (66.70)      | 548 (58.42)  | 581 (63.29)  |
| Female                                | 294 (33.30)      | 390 (41.58)  | 337 (36.71)  |
| <b>Monthly living expenses (yuan)</b> |                  |              |              |
| ≤1200                                 | 413 (46.77)      | 448 (47.76)  | 520 (56.64)  |
| >1200                                 | 470 (53.23)      | 490 (52.24)  | 398 (43.36)  |
| <b>Major</b>                          |                  |              |              |
| Clinical Medicine                     | 351 (39.75)      | 331 (35.29)  | 226 (24.62)  |
| Others                                | 532 (60.25)      | 607 (64.71)  | 692 (75.38)  |
| <b>Obesity</b>                        |                  |              |              |
| No                                    | 735 (88.34)      | 766 (87.64)  | 612 (86.56)  |
| Yes                                   | 97 (11.66)       | 108 (12.36)  | 95 (13.44)   |

|                          |             |             |             |
|--------------------------|-------------|-------------|-------------|
| <b>Smoking</b>           |             |             |             |
| No                       | 738 (83.58) | 685 (73.03) | 382 (41.61) |
| Yes                      | 145 (16.42) | 253 (26.97) | 536 (58.39) |
| <b>Drinking</b>          |             |             |             |
| No                       | 644 (72.93) | 542 (57.78) | 333 (36.27) |
| Yes                      | 239 (27.07) | 396 (42.22) | 585 (63.73) |
| <b>Physical activity</b> |             |             |             |
| Inactive                 | 507 (61.45) | 541 (61.97) | 687 (81.59) |
| Partially active         | 168 (20.36) | 190 (21.76) | 75 (8.91)   |
| Active                   | 150 (18.18) | 142 (16.27) | 80 (9.50)   |

Values were means (standard deviation) or n (percentages), and values of polytomous variables may not sum to 100% because of rounding.

**Table S3.** Characteristics of participants according to tertiles of emotional eating.

| Characteristic                        | Emotional Eating |              |              |
|---------------------------------------|------------------|--------------|--------------|
|                                       | Tertile 1        | Tertile 2    | Tertile 3    |
| <b>N</b>                              | 842              | 959          | 938          |
| <b>Age (years)</b>                    | 21.31 ± 2.56     | 21.61 ± 2.64 | 22.13 ± 2.95 |
| <b>BMI (kg/m<sup>2</sup>)</b>         | 22.77 ± 6.62     | 22.96 ± 6.61 | 23.13 ± 7.13 |
| <b>Gender</b>                         |                  |              |              |
| Male                                  | 532 (63.18)      | 566 (59.02)  | 620 (66.10)  |
| Female                                | 310 (36.82)      | 393 (40.98)  | 318 (33.90)  |
| <b>Monthly living expenses (yuan)</b> |                  |              |              |
| ≤1200                                 | 363 (43.11)      | 469 (48.91)  | 549 (58.53)  |
| >1200                                 | 479 (56.89)      | 490 (51.09)  | 389 (41.47)  |
| <b>Major</b>                          |                  |              |              |
| Clinical Medicine                     | 337 (40.02)      | 343 (35.77)  | 228 (24.31)  |
| Others                                | 505 (59.98)      | 616 (64.23)  | 710 (75.69)  |
| <b>Obesity</b>                        |                  |              |              |
| No                                    | 704 (87.89)      | 795 (88.63)  | 614 (85.87)  |
| Yes                                   | 97 (12.11)       | 102 (11.37)  | 101 (14.13)  |
| <b>Smoking</b>                        |                  |              |              |
| No                                    | 713 (84.68)      | 721 (75.18)  | 371 (39.55)  |
| Yes                                   | 129 (15.32)      | 238 (24.82)  | 567 (60.45)  |
| <b>Drinking</b>                       |                  |              |              |
| No                                    | 618 (73.40)      | 572 (59.65)  | 329 (35.07)  |
| Yes                                   | 224 (26.60)      | 387 (40.35)  | 609 (61.93)  |
| <b>Physical activity</b>              |                  |              |              |
| Inactive                              | 427 (54.39)      | 572 (63.63)  | 736 (85.98)  |
| Partially active                      | 191 (24.33)      | 187 (20.80)  | 55 (6.43)    |
| Active                                | 167 (21.27)      | 140 (15.57)  | 65 (7.59)    |

Values were means (standard deviation) or n (percentages), and values of polytomous variables may not sum to 100% because of rounding.

**Table S4.** Stratified analyses for association between emotional eating and irritable bowel syndrome.

| Exposure                              | Emotional Eating |                  |                   | <i>p</i> for Interaction |
|---------------------------------------|------------------|------------------|-------------------|--------------------------|
|                                       | Tertile 1        | Tertile 2        | Tertile 3         |                          |
| <b>Gender</b>                         |                  |                  |                   | <b>&lt;0.001</b>         |
| Male (N = 1718)                       | 1.00             | 3.20 (1.61,6.38) | 8.82 (4.57,17.00) |                          |
| Female (N = 1021)                     | 1.00             | 0.91 (0.53,1.55) | 1.45 (0.80,2.61)  |                          |
| <b>Monthly living expenses (yuan)</b> |                  |                  |                   | <b>&lt;0.001</b>         |
| ≤1200 (N = 1381)                      | 1.00             | 3.71 (1.81,7.58) | 7.67 (3.79,15.50) |                          |
| >1200 (N = 1358)                      | 1.00             | 0.91 (0.53,1.56) | 2.56 (1.53,4.26)  |                          |
| <b>Major</b>                          |                  |                  |                   | <b>&lt;0.001</b>         |
| Clinical Medicine (N = 908)           | 1.00             | 1.13 (0.59,2.17) | 1.36 (0.66,2.79)  |                          |
| Others (N = 1831)                     | 1.00             | 2.18 (1.28,3.71) | 6.06 (3.63,10.11) |                          |
| <b>Smoking</b>                        |                  |                  |                   | <b>&lt;0.001</b>         |
| No (N = 1805)                         | 1.00             | 1.35 (0.86,2.13) | 2.52 (1.55,4.11)  |                          |
| Yes (N = 934)                         | 1.00             | 3.32 (1.21,9.12) | 9.15 (3.57,23.48) |                          |
| <b>Drinking</b>                       |                  |                  |                   | <b>&lt;0.001</b>         |
| No (N = 1519)                         | 1.00             | 1.61 (0.95,2.71) | 3.19 (1.85,5.50)  |                          |
| Yes (N = 1220)                        | 1.00             | 1.64 (0.85,3.15) | 4.22 (2.28,7.82)  |                          |
| <b>Physical activity</b>              |                  |                  |                   | <b>&lt;0.001</b>         |
| Inactive (N = 1735)                   | 1.00             | 2.55 (1.40,4.65) | 6.24 (3.54,11.03) |                          |
| Partially active (N = 433)            | 1.00             | 0.87 (0.41,1.88) | 0.62 (0.17,2.31)  |                          |
| Active (N = 372)                      | 1.00             | 0.98 (0.35,2.72) | 2.11 (0.73,6.08)  |                          |

Adjusted for age, gender, monthly living expenses, major, smoking, drinking, and physical activity. Of note, variables examined in this table were not adjusted.

**Table S5.** Stratified analyses for association between external eating and irritable bowel syndrome.

| Exposure                              | External Eating |                  |                   | <i>p</i> for Interaction |
|---------------------------------------|-----------------|------------------|-------------------|--------------------------|
|                                       | Tertile 1       | Tertile 2        | Tertile 3         |                          |
| <b>Gender</b>                         |                 |                  |                   | <b>&lt;0.001</b>         |
| Male (N = 1718)                       | 1.00            | 2.46 (1.38,4.38) | 6.10 (3.62,10.27) |                          |
| Female (N = 1021)                     | 1.00            | 3.13 (1.51,6.47) | 4.32 (2.09,8.91)  |                          |
| <b>Monthly living expenses (yuan)</b> |                 |                  |                   | <b>&lt;0.001</b>         |
| ≤1200 (N = 1381)                      | 1.00            | 2.55 (1.40,4.67) | 4.89 (2.79,8.55)  |                          |
| >1200 (N = 1358)                      | 1.00            | 3.52 (1.80,6.88) | 6.71 (3.52,12.78) |                          |
| <b>Major</b>                          |                 |                  |                   | <b>&lt;0.001</b>         |
| Clinical Medicine (N = 908)           | 1.00            | 2.80 (1.26,6.23) | 3.41 (1.55,7.48)  |                          |
| Others (N = 1831)                     | 1.00            | 3.20 (1.87,5.47) | 6.81 (4.12,11.27) |                          |
| <b>Smoking</b>                        |                 |                  |                   | <b>&lt;0.001</b>         |
| No (N = 1805)                         | 1.00            | 3.02 (1.75,5.22) | 4.74 (2.75,8.15)  |                          |
| Yes (N = 934)                         | 1.00            | 2.65 (1.22,5.79) | 6.39 (3.19,12.80) |                          |
| <b>Drinking</b>                       |                 |                  |                   | <b>&lt;0.001</b>         |
| No (N = 1519)                         | 1.00            | 4.42 (2.33,8.38) | 6.31 (3.33,11.96) |                          |
| Yes (N = 1220)                        | 1.00            | 1.88 (1.01,3.52) | 4.63 (2.64,8.13)  |                          |
| <b>Physical activity</b>              |                 |                  |                   | <b>&lt;0.001</b>         |
| Inactive (N = 1735)                   | 1.00            | 3.13 (1.80,5.44) | 6.69 (4.01,11.16) |                          |
| Partially active (N = 433)            | 1.00            | 1.73 (0.63,4.74) | 3.05 (1.05,8.81)  |                          |
| Active (N = 372)                      | 1.00            | 2.53 (0.75,8.58) | 2.51 (0.73,8.61)  |                          |

Adjusted for age, gender, monthly living expenses, major, smoking, drinking, and physical activity. Of note, variables examined in this table were not adjusted.

**Table S6.** Stratified analyses for association between restraint eating and irritable bowel syndrome.

| Exposure                              | Restraint Eating |                  |                   | <i>p</i> for Interaction |
|---------------------------------------|------------------|------------------|-------------------|--------------------------|
|                                       | Tertile 1        | Tertile 2        | Tertile 3         |                          |
| <b>Gender</b>                         |                  |                  |                   | <b>&lt;0.001</b>         |
| Male (N = 1718)                       | 1.00             | 4.01 (2.07,7.76) | 9.49 (5.08,17.82) |                          |
| Female (N = 1021)                     | 1.00             | 1.62 (0.90,2.93) | 2.06 (1.10,3.84)  |                          |
| <b>Monthly living expenses (yuan)</b> |                  |                  |                   | <b>&lt;0.001</b>         |
| ≤1200 (N = 1381)                      | 1.00             | 4.13 (2.08,8.23) | 8.34 (4.27,16.27) |                          |
| >1200 (N = 1358)                      | 1.00             | 1.97 (1.12,3.50) | 3.48 (1.98,6.11)  |                          |
| <b>Major</b>                          |                  |                  |                   | <b>&lt;0.001</b>         |
| Clinical Medicine (N = 908)           | 1.00             | 2.21 (1.11,4.42) | 2.24 (1.06,4.74)  |                          |
| Others (N = 1831)                     | 1.00             | 3.35 (1.90,5.88) | 7.62 (4.42,13.12) |                          |
| <b>Smoking</b>                        |                  |                  |                   | <b>&lt;0.001</b>         |
| No (N = 1805)                         | 1.00             | 2.63 (1.61,4.29) | 3.41 (2.01,5.78)  |                          |
| Yes (N = 934)                         | 1.00             | 2.99 (1.17,7.66) | 9.11 (3.84,21.59) |                          |
| <b>Drinking</b>                       |                  |                  |                   | <b>&lt;0.001</b>         |
| No (N = 1519)                         | 1.00             | 3.20 (1.82,5.61) | 4.11 (2.26,7.48)  |                          |
| Yes (N = 1220)                        | 1.00             | 2.13 (1.08,4.23) | 5.80 (3.07,10.98) |                          |
| <b>Physical activity</b>              |                  |                  |                   | <b>&lt;0.001</b>         |
| Inactive (N = 1735)                   | 1.00             | 2.92 (1.67,5.11) | 6.48 (3.82,10.98) |                          |
| Partially active (N = 433)            | 1.00             | 2.03 (0.86,4.83) | 0.78 (0.22,2.84)  |                          |
| Active (N = 372)                      | 1.00             | 2.21 (0.63,7.74) | 5.10 (1.49,17.44) |                          |

Adjusted for age, gender, monthly living expenses, major, smoking, drinking, and physical activity. Of note, variables examined in this table were not adjusted.
